# Supplementary material
Source: publisher site journal article supplement (https://www.dovepress.com/article/371477)
Supplement: Supplementary file 1 [file get_supplementary_file.php]

**Table S1** Primers used in this study

| Primers | Sequence (5′ to 3′) | Reference |
| --- | --- | --- |
| K1_F | GGTGCTCTTTACATCATTGC | 15 |
| K1_R | GCAATGGCCATTTGCGTTAG |  |
| K2_F | GACCCGATATTCATACTTGACAGAG | 18 |
| K2_R | CCTGAAGTAAAATCGTAAATAGATGGC |  |
| K5_F | TGGTAGTGATGCTCGCGA | 18 |
| K5_R | CCTGAACCCACCCCAATC |  |
| K20_F | CGGTGCTACAGTGCATCATT | 15 |
| K20_R | GTTATACGATGCTCAGTCGC |  |
| K54_F | CATTAGCTCAGTGGTTGGCT | 15 |
| K54_R | GCTTGACAAACACCATAGCAG |  |
| K57_F | CGACAAATCTCTCCTGACGA | 1 |
| K57_R | CGCGACAAACATAACACTCG |  |
| *rmpA*_F | ACTGGGCTACCTCTGCTTCA | 17 |
| *rmpA*_R | CTTGCATGAGCCATCTTTCA |  |
| *rmpA2*_F | AGAGTATTGGTTGATAGCCGGA | 16 |
| *rmpA2*_R | GAAATGTCAAGCCACATCCATTG |  |
| *iroBCD* cluster_F | AGAGGCTGGATTGGTGGCGTTTG | 16 |
| *iroBCD* cluster_R | CGATCTGTGGAATACCGGCGTGTAG |  |
| *iucABCD* cluster_F | CCAACTCCGTCCGTACCCTGTCA | 16 |
| *iucABCD* cluster_R | CGAGGGATCGACGATGGTGTTCT |  |
| *ybtS*_F | CAAAAATGGGCGGTGGATTC | 19 |
| *ybtS*_R | CCTGACGGAACATAAACGAGCG |  |
| *clbA*_F | CTAGATTATCCGTGGCGATTC | 10 |
| *clbA*_R | CAGATACACAGATACCATTCA |  |
| *clbB*_F | GATTTGGATACTGGCGATAACCG | 10 |
| *clbB*_R | CCATTTCCCGTTTGAGCACAC |  |
| *clbN*_F | GTTTTGCTCGCCAGATAGTCATTC | 10 |
| *clbN*_R | CAGTTCGGGTATGTGTGGAAGG |  |
| *clbQ*_F | CTTGTATAGTTACACAACTATTTC | 10 |
| *clbQ*_R | TTATCCTGTTAGCTTTCGTTC |  |
| *wabG*_F | ACCATCGGCCATTTGATAGA | 20 |
| *wabG*_R | CGGACTGGCAGATCCATATC |  |
| *uge*_F | TCTTCACGCCTTCCTTCACT | 20 |
| *uge*_R | GATCATCCGGTCTCCCTGTA |  |
| *fimH*_F | TGCTGCTGGGCTGGTCGATG | 20 |
| *fimH*_R | GGGAGGGTGACGGTGACATC |  |
| *mrkD*_F | AAGCTATCGCTGTACTTCCGGCA | 10 |
| *mrkD*_R | GGCGTTGGCGCTCAGATAGG |  |
| *allS*_F | CCGAAACATTACGCACCTTT | 21 |
| *allS*_R | ATCACGAAGAGCCAGGTCAC |  |

**Table** **S2** Distribution of sequence types (STs) and serotypes in *K. pneumoniae* causing BSI

|  | hvKP | | cKP | |
| --- | --- | --- | --- | --- |
| Isolates | STs | Serotypes | STs | Serotypes |
| kpn1 | NA | NA | 101 | NA |
| kpn2 | NA | NA | nST1 | NA |
| kpn3 | NA | NA | nST2 | NA |
| kpn4 | NA | NA | nST3 | NA |
| **kpn5**a | 412 | NA | NA | NA |
| **kpn6** | 35 | NA | NA | NA |
| kpn7 | NA | NA | nST4 | NA |
| kpn8 | NA | NA | 277 | NA |
| **kpn9** | 420 | NA | NA | NA |
| kpn10 | NA | NA | 367 | K1 |
| **kpn11** | 29 | NA | NA | NA |
| **kpn12** | 23 | K1 | NA | NA |
| **kpn13** | 86 | K2 | NA | NA |
| **kpn14** | 412 | NA | NA | NA |
| **kpn15** | 380 | K2 | NA | NA |
| **kpn16** | 23 | K1 | NA | NA |
| kpn17 | NA | NA | 160 | NA |
| kpn18 | NA | NA | nST5 | K1 |
| **kpn19** | 86 | K2 | NA | NA |
| kpn20 | NA | NA | 1049 | NA |
| kpn21 | NA | NA | 485 | NA |
| **kpn22** | 4263 | NA | NA | NA |
| **kpn23** | 494 | NA | NA | NA |
| kpn24 | NA | NA | nST6 | NA |
| kpn25 | NA | NA | 25 | K2 |
| kpn26 | NA | NA | nST7 | NA |
| **kpn27** | 23 | K1 | NA | NA |
| kpn28 | NA | NA | 29 | K54 |
| kpn29 | NA | NA | 2185 | NA |
| kpn30 | NA | NA | 1758 | K2 |
| **kpn31** | 65 | K2 | NA | NA |
| **kpn32** | 23 | K1 | NA | NA |
| **kpn33** | 23 | K1 | NA | NA |
| kpn34 | NA | NA | nST8 | NA |
| kpn35 | NA | NA | 3048 | NA |
| kpn36 | NA | NA | nST9 | NA |
| kpn37 | NA | NA | 1886 | NA |
| kpn38 | NA | NA | nST10 | NA |
| kpn39 | NA | NA | 656 | NA |
| **kpn40** | 23 | K1 | NA | NA |
| **kpn41** | nST11 | K2 | NA | NA |
| kpn42 | NA | NA | 1764 | NA |
| kpn43 | NA | NA | 86 | K2 |
| kpn44 | NA | NA | nST12 | NA |
| kpn45 | NA | NA | 307 | NA |
| **kpn46** | 1886 | K2 | NA | NA |
| **kpn47** | 893 | K20 | NA | NA |
| kpn48 | NA | NA | nST13 | NA |
| kpn49 | NA | NA | 1584 | NA |
| **kpn50** | 380 | K2 | NA | NA |
| **kpn52** | nST14 | K1 | NA | NA |
| **kpn53** | 375 | K2 | NA | NA |
| kpn54 | NA | NA | 283 | NA |
| **kpn55** | nST15 | K1 | NA | NA |
| kpn56 | NA | NA | nST16 | NA |
| **kpn57** | nST17 | K1 | NA | NA |
| **kpn58** | nST18 | K1 | NA | NA |
| kpn59 | NA | NA | nST19 | NA |
| **kpn60** | 23 | K1 | NA | NA |
| kpn61 | NA | NA | 1540 | NA |
| kpn62 | NA | NA | 17 | NA |
| kpn63 | NA | NA | nST20 | NA |
| kpn64 | NA | NA | nST21 | NA |
| **kpn65** | nST22 | K1 | NA | NA |
| **kpn66** | 65 | K2 | NA | NA |
| kpn67 | NA | NA | nST23 | NA |

Abbreviations: BSI, bloodstream infection; NA, not available; nST, new sequence type. ahypervirulent strains were highlighted in bold.
